# Supplementary material for: Micellar catalysis in aqueous–ionic liquid systems
Source: Royal Society of Chemistry journal article supplement (doi:10.1039/c2cc31503c), 2012-01-01
Supplement: c2cc31503c.pdf [file c2cc31503c.pdf]

## Supporting Information

### Micellar catalysis in aqueous - ionic liquids systems

**Katharina Bica,<sup>\*a</sup> Peter Gaertner,<sup>a</sup> Phillip J. Gritsch,<sup>a,b</sup> Anna K. Ressmann,<sup>a</sup> Christian Schröder,<sup>c</sup> and Ronald Zirbs<sup>d</sup>**

<sup>a</sup> *Institute of Applied Synthetic Chemistry, Vienna University of Technology,  
Getreidemarkt 9/163, Vienna, Austria.*

*Fax: +43 1 58801 16399; Tel: +43 1 58801 163601;*

*E-mail: [kbica@ioc.tuwien.ac.at](mailto:kbica@ioc.tuwien.ac.at)*

<sup>b</sup> *Current Address: Institute of Organic Chemistry, Leibniz University of Hannover,  
Schneiderberg 1, 30167 Hannover, Germany.*

<sup>c</sup> *Institute of Computational Biological Chemistry, University of Vienna,  
Währingerstr. 17, 1090 Wien, Austria.*

<sup>d</sup> *Institute of Nanobiotechnology (NBT), University of Natural Resources and Life Sciences,  
Muthgasse 11, 1190 Vienna, Austria.*

## 1. Materials and Methods

Commercially available reagents and solvents were used as received from Sigma Aldrich unless otherwise specified. Ionic liquids [C<sub>8</sub>mim]Cl, [C<sub>10</sub>mim]Cl, [C<sub>12</sub>mim]Cl, and [C<sub>14</sub>mim]Cl were prepared from freshly distilled *N*-methylimidazole and alkylchloride according to literature. Solid [C<sub>12</sub>mim]Cl, and [C<sub>14</sub>mim]Cl were crystallized from THF until colorless crystals were obtained. All ionic liquids were dried for at least 24-48 h at 80 °C and 0.01 mbar before use and were stored under Argon. The purity of all ionic liquids was checked by <sup>1</sup>H and <sup>13</sup>C NMR spectroscopic analysis and was found to be >99 wt%. *N*-Benzylmaleimide was prepared as previously reported and analytical data were in accordance with literature.<sup>1</sup> Based on its low solubility in water, *N*-benzylmaleimide was handled as stock solution in acetonitrile (91.17 mM). 1,3-Cyclohexadiene was distilled on a weekly basis and stored under Argon at -20 °C.

Doubly-distilled deionised water was obtained from a Millipore Milli-Q water purification system (Millipore, USA). All ionic liquid-aqueous solutions were left under shaking with 360 min<sup>-1</sup> at 25 °C for 24 h to equilibrate.

UV-vis spectroscopy was performed on a Shimadzu UV1800 spectrometer equipped with a thermostat at 25 °C for 60 min.

Dynamic Light Scattering was performed on Malvern Nano Zetasizer. Samples were equilibrated at 25 °C and measured in back-scattering mode for 10-15 runs with 10 seconds. At least three consistent measurements per solution and reaction were recorded.

<sup>1</sup>H and <sup>13</sup>C NMR spectra were recorded on a Bruker AC 200 at 200 and 50 MHz, respectively, using the solvent peak as reference. J values are given in Hz.

GC-MS analyses were conducted on a VOYAGER Quadrupole (Thermo Finnigan) directly interfaced to a GC 8000 TOP gas chromatograph using a BGB-5 (30 m x 0.32 mm i.d., 1.0 µm film thickness) cross-bonded dimethyl polysiloxane capillary column. The oven program temperature was 80 °C (2 min)//10 °C min<sup>-1</sup>//280 °C (2 min). Source and transfer line temperatures were set at 200 and 280 °C, respectively.

## 2. MD simulations of 50 mM [C<sub>12</sub>mim]Cl

MD simulations of 50 mM [C<sub>12</sub>mim]Cl in water were done according to the following parameters:

|                     | number | Force field parameter            |
|---------------------|--------|----------------------------------|
| C <sub>12</sub> mim | 10     | J. Phys. Chem. B 108(2004), 2038 |
| Cl                  | 10     | J. Chem. Phys. 100 (1994), 9050  |
| water               | 11000  | J. Chem. Phys. 79(1983), 926     |

|                      |                                                                                 |
|----------------------|---------------------------------------------------------------------------------|
| time step            | 1 fs                                                                            |
| simulation period    | 2 ns                                                                            |
| simulation boxlength | 69.3 Å                                                                          |
| real space cutoff    | 12 Å                                                                            |
| Ewald $\kappa$       | 0.41 Å <sup>-1</sup>                                                            |
| thermostat           | 300 K $\tau = 0.1$ ps (normal atoms)<br>1 K $\tau = 0.005$ ps (Drude particles) |
| Drude mass           | 0.2 amu                                                                         |
| Drude force constant | 500 kcal/mol Å <sup>2</sup>                                                     |
| $\alpha$ (carbon)    | 1.2886 Å <sup>-3</sup> (J. Phys. Chem. A 102(1998), 2399)                       |
| $\alpha$ (nitrogen)  | 0.97157 Å <sup>-3</sup> (J. Phys. Chem. A 102(1998), 2399)                      |

### 3. Experimental procedures

#### 3.1. Kinetics measurement

Freshly distilled 1,3-cyclohexadiene (diene) was dissolved in an ionic liquid/aqueous solution to obtain a 24 mM solution (**Solution A**). A concentrated stock solution of *N*-benzylmaleimide (dienophile) in acetonitril was added to an ionic liquid/aqueous solution and equilibrated for 1 min (**Solution B**).

Equal volumina of **Solution A** (0.5 ml corresponding to 0.012 mmol diene) and of **Solution B** (0.5 ml corresponding to 0.0002 mmol dienophile) were combined in a fused quartz glass cuvette of 1.00 cm path length and quickly mixed with a Pasteur pipette. The solution was immediately transferred into the photometer and followed at 298 nm for 60 min using the diene solution (**Solution A**) as reference.

Rate constants  $k'$  were obtained according to the pseudo-first order model:

$$\begin{aligned}
 r &= k \cdot [A] \cdot [B] \\
 r &= k' \cdot [A] \\
 \frac{d([A])}{d(t)} &= -k' \cdot ([A]) \\
 \frac{d([A])}{[A]} &= -k' \cdot d(t)
 \end{aligned}
 \qquad
 \begin{aligned}
 \ln([A]) - \ln([A]_0) &= -k' \cdot t \\
 \ln\left(\frac{[A]}{[A]_0}\right) &= -k' \cdot t \\
 [A] &= [A]_0 \cdot e^{-k' \cdot t}
 \end{aligned}$$

All reported rate constants are the average of at least five kinetic measurements under each experimental condition.

4. Fig. S2: Size distribution by intensity in the course of the Diels-Alder reaction in a 50 mM  $[C_{12}mim]Cl$  solution

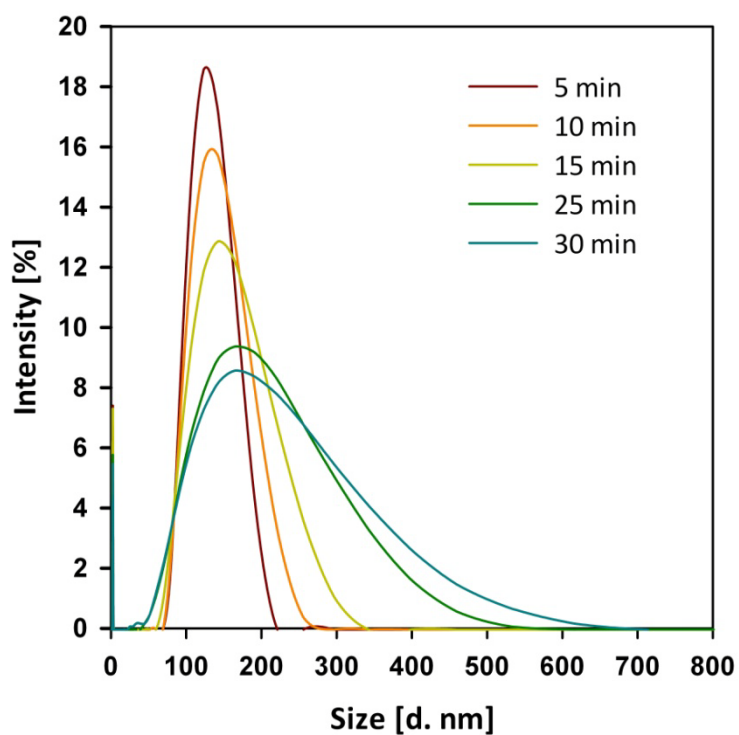

5. Fig. S3: Size distribution by intensity in the course of the Diels-Alder reaction in a 50 mM  $[C_{14}mim]Cl$  solution

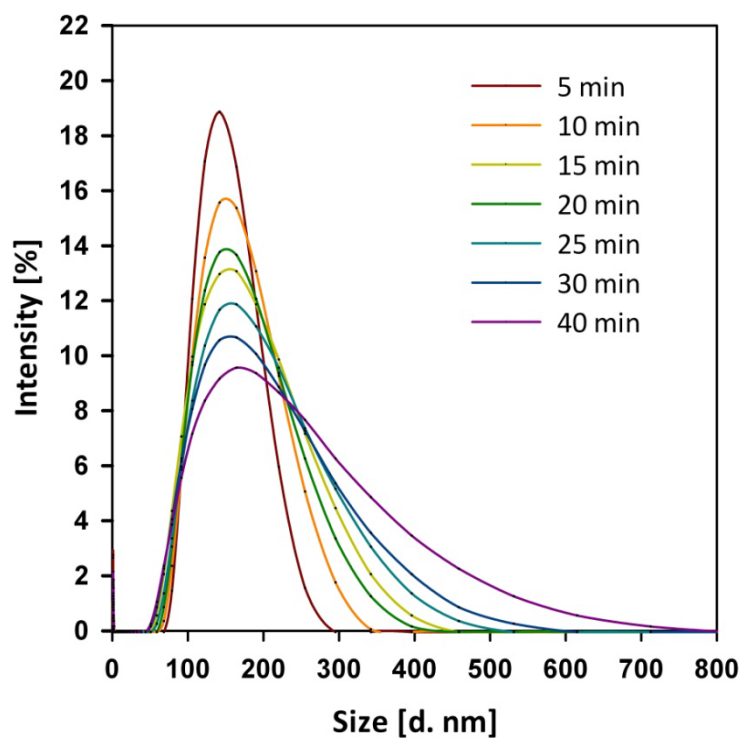

6. Fig. S4: Copy of  $^1\text{H}$ -NMR spectrum of the Diels-Alder product **3** isolated via crystallization from a 100 mM  $[\text{C}_{10}\text{mim}]\text{Cl}$  solution

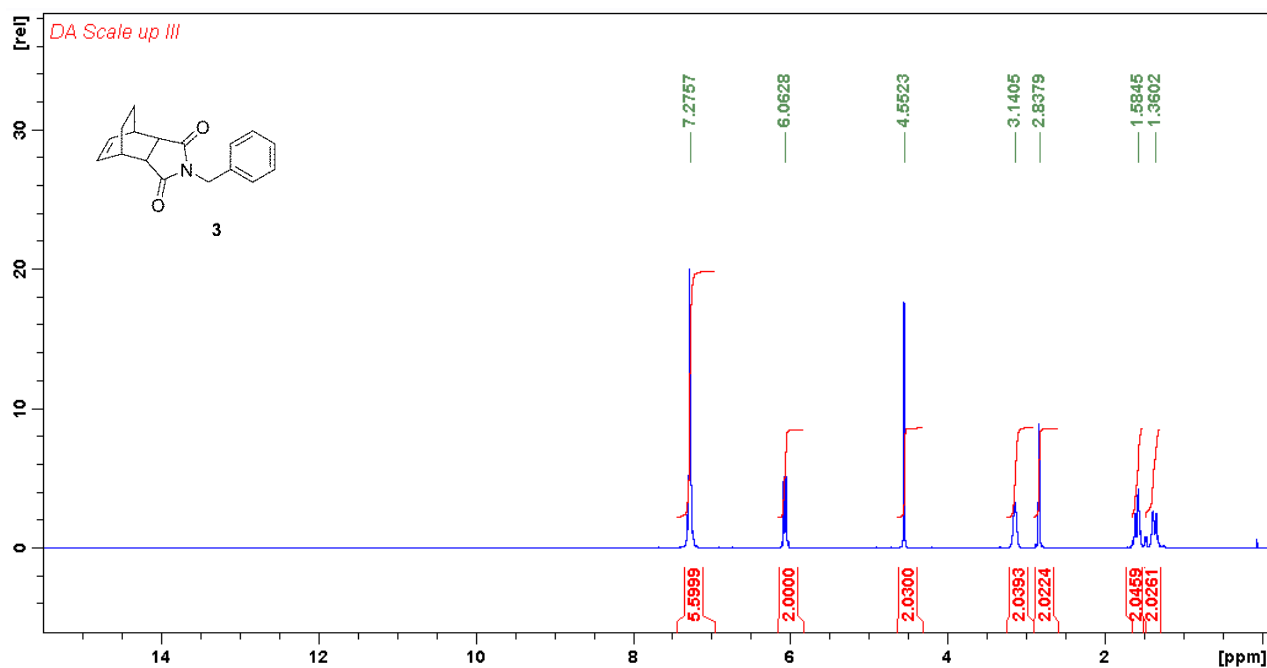

7. Fig. S5: Copy of GC-MS trace of the Diels-Alder product **3** isolated via crystallization from a 100 mM  $[\text{C}_{10}\text{mim}]\text{Cl}$  solution

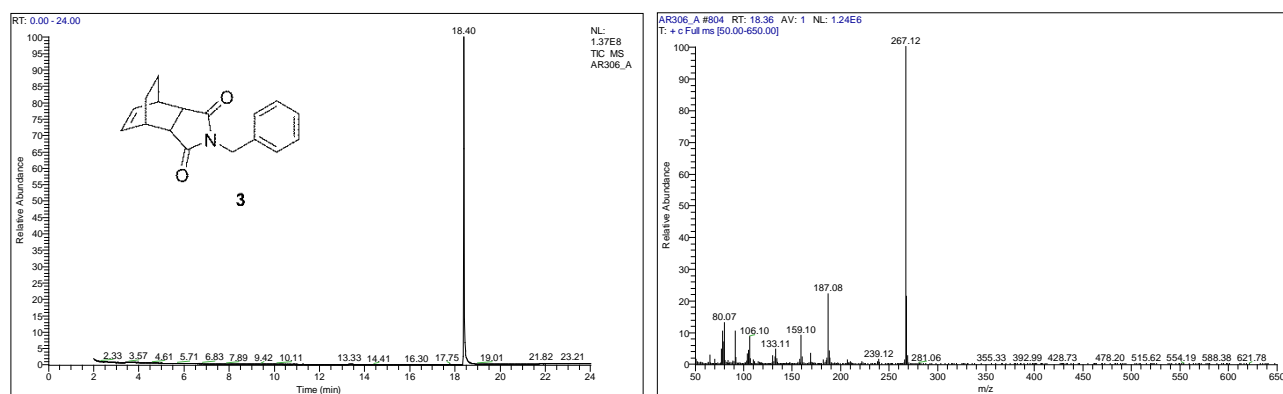

<sup>1</sup> N. Matuszak, G. G. Muccioli, G. Labar, D. M. Lambert, *J. Med. Chem.*, 2009, **52**, 7410.
